# Supplementary material for: Deriving a per-field land use and land cover map in an agricultural mosaic catchment
Source: Copernicus journal article supplement (doi:10.5194/essdd-7-271-2014), 2014-04-30
Supplement: Supplementary file 1 [file lulc_supplement.pdf › lulc_supplement.pdf]

# Deriving a per-field land use and land cover map in an agricultural mosaic catchment

Bumsuk Seo<sup>1,2</sup>, Christina Bogner<sup>2</sup>, Patrick Poppenborg<sup>3</sup>, Emily Martin<sup>4</sup>,  
Mathias Hoffmeister<sup>5,6</sup>, Mansig Jun<sup>7</sup>, Thomas Koellner<sup>3</sup>, Björn  
Reineking<sup>1,8</sup>, Christopher L. Shope<sup>9</sup>, and John Tenhunen<sup>10</sup>

<sup>1</sup>*Biogeographical Modelling, BayCEER, University of Bayreuth, Universitätsstraße 30, 95447 Bayreuth, Germany*

<sup>2</sup>*Ecological Modelling, BayCEER, University of Bayreuth, Dr.-Hans-Frisch-Str. 1–3, 95448 Bayreuth, Germany*

<sup>3</sup>*Professorship of Ecological Services, BayCEER, University of Bayreuth, Universitätsstraße 30, 95447 Bayreuth, Germany*

<sup>4</sup>*Department of Animal Ecology and Tropical Biology, Biocentre, University of Würzburg, Am Hubland, 97074 Würzburg, Germany*

<sup>5</sup>*Department of Organismic Biology, University Salzburg, Hellbrunnerstrasse 34, 5020 Salzburg, Austria*

<sup>6</sup>*Institute of Sensory Ecology, Department of Biology, Heinrich-Heine-University Düsseldorf, Universitätsstraße 1, 40225 Düsseldorf, Germany*

<sup>7</sup>*Regional Institute for Gangwon, Junangro 5-GA, Chuncheon, Republic of Korea*

<sup>8</sup>*UR EMGR Écosystèmes Montagnards, Irstea, 2 rue de la Papeterie-BP 76, F-38402, St-Martin-d'Hères, France*

<sup>9</sup>*U.S. Geological Survey, 2329 W. Orton Circle, Salt Lake City, UT 84119-2047, USA*

<sup>10</sup>*Plant Ecology Department, University of Bayreuth, Universitätsstraße 30, 95447 Bayreuth, Germany*

April 16, 2014

## Supplementary Material

### 1 List of Tables

|    |     |                                                                             |   |
|----|-----|-----------------------------------------------------------------------------|---|
| 2  | ST1 | Crop types adopted from the FAO-LCCS (Di Gregorio, 2005). The column        |   |
| 3  |     | ‘Crop type’ shows the definition and the column ‘Major local crops’ lists   |   |
| 4  |     | the six types recorded during the field campaign (2009-2011). . . . .       | 2 |
| 5  | ST2 | Four levels in the FAO-LCCS (Di Gregorio, 2005). . . . .                    | 3 |
| 6  | ST3 | Changes of land use/land cover according to the classification scheme S1 in |   |
| 7  |     | percent. The LULC type ‘dry field’ was assigned to patches with unknown     |   |
| 8  |     | type of dry field crop. Note that in 2011 we only surveyed the northern     |   |
| 9  |     | half of catchment and there are 12.35% of missing data. In consequence a    |   |
| 10 |     | comparison can only be made between 2009 and 2010. . . . .                  | 4 |

---

\*Corresponding author: Bumsuk Seo (Bumsuk.Seo@uni-bayreuth.de)

Table ST1: Crop types adopted from the FAO-LCCS (Di Gregorio, 2005). The column ‘Crop type’ shows the definition and the column ‘Major local crops’ lists the six types recorded during the field campaign (2009-2011).

|                | Crop type                           | Major local crops                                  |
|----------------|-------------------------------------|----------------------------------------------------|
| Food Crops     | Cereals and Pseudocereals           | Rice                                               |
|                | Roots and Tubers                    | Potato and White radish                            |
|                | Pulses and Vegetables               | Chinese Cabbage,<br>European Cabbage and<br>Pepper |
|                | Fruit and Nuts                      | Apple, Peach and Grape                             |
|                | Fodder Crops                        | Rye                                                |
|                | Beverages and Stimulants            | Not observed                                       |
|                | Other Food crops                    | Not observed                                       |
| Non-Food Crops | Industrial Crops                    | Ginseng, Sesame and<br>Soybean                     |
|                | Wood and Timber                     | Not observed                                       |
|                | Crops for Biological Filtration     | Not observed                                       |
|                | Fibre Crops and Structural Material | Not observed                                       |
|                | Other non-food crops                | Not observed                                       |

Table ST2: Four levels in the FAO-LCCS (Di Gregorio, 2005).

| Presence of Vegetation           | Edaphic Condition            | Artificiality of Cover | Major Land Cover Types (LCCS code)                                     |
|----------------------------------|------------------------------|------------------------|------------------------------------------------------------------------|
| Primarily vegetated area (A)     | Terrestrial                  | Artificial/managed     | Cultivated and Managed Terrestrial Area (A11)                          |
|                                  |                              | (Semi-)natural         | Natural and Semi-Natural Terrestrial Vegetation (A12)                  |
|                                  | Aquatic or Regularly Flooded | Artificial/managed     | Cultivated Aquatic or Regularly Flooded Vegetation (A23)               |
| Primarily non-vegetated area (B) | Terrestrial                  | (Semi-)natural         | Natural and Semi-natural Aquatic or Regularly Flooded Vegetation (A24) |
|                                  |                              | Artificial/managed     | Artificial Surfaces and Associated Area (B15)                          |
|                                  |                              | (Semi-)natural         | Bare Area (B16)                                                        |
|                                  | Aquatic or Regularly Flooded | Artificial/managed     | Artificial Waterbodies, Snow and Ice (B27)                             |
|                                  |                              | (Semi-)natural         | Natural Waterbodies, Snow and Ice (B28)                                |

Table ST3: Changes of land use/land cover according to the classification scheme S1 in percent. The LULC type ‘dry field’ was assigned to patches with unknown type of dry field crop. Note that in 2011 we only surveyed the northern half of catchment and there are 12.35% of missing data. In consequence a comparison can only be made between 2009 and 2010.

| LULC type          | 2009   | 2010   | 2011   | LULC type            | 2009  | 2010  | 2011   |
|--------------------|--------|--------|--------|----------------------|-------|-------|--------|
| Acanthopanax       | 0.260  | 0.291  | 0.110  | lettuce              | 0.000 | 0.005 | 0.000  |
| apple              | 0.255  | 0.520  | 0.410  | Ligularia fischeri   | 0.085 | 0.085 | 0.031  |
| Aster scaber       | 0.011  | 0.011  | 0.011  | maize                | 0.709 | 0.294 | 0.116  |
| bare soil          | 0.098  | 0.144  | 0.027  | medicinal herb       | 0.050 | 0.125 | 0.000  |
| barren             | 0.216  | 0.080  | 0.050  | mixed dry field      | 0.087 | 0.133 | 1.206  |
| bean               | 2.146  | 2.280  | 1.245  | mixed forest         | 2.060 | 2.082 | 2.093  |
| bracken            | 0.245  | 0.014  | 0.007  | orchard              | 0.016 | 0.049 | 0.031  |
| bridge             | 0.001  | 0.001  | 0.001  | orchard preparation  | 0.123 | 0.000 | 0.016  |
| broccoli           | 0.000  | 0.044  | 0.019  | peach                | 0.461 | 0.594 | 0.289  |
| C4 cover crop      | 0.000  | 0.070  | 0.000  | pepper               | 0.237 | 0.245 | 0.088  |
| cabbage            | 0.021  | 0.000  | 0.138  | permanant wetland    | 0.001 | 0.001 | 0.001  |
| cattle barn        | 0.008  | 0.008  | 0.005  | pine forest          | 0.149 | 0.149 | 0.236  |
| chicory            | 0.000  | 0.014  | 0.000  | potato               | 3.268 | 2.461 | 1.022  |
| chinese bellflower | 0.049  | 0.000  | 0.000  | pumpkin              | 0.129 | 0.024 | 0.002  |
| chinese cabbage    | 0.182  | 0.514  | 0.018  | reservoir            | 0.068 | 0.233 | 0.238  |
| chinese millet     | 0.041  | 0.000  | 0.000  | rice paddy           | 8.499 | 8.093 | 4.650  |
| codonopsis         | 0.481  | 0.458  | 0.305  | riparian zone        | 0.091 | 0.090 | 0.065  |
| common ragweed     | 0.007  | 0.007  | 0.007  | rye                  | 0.259 | 0.769 | 0.935  |
| coniferous forest  | 0.141  | 0.141  | 0.064  | sanchae              | 0.015 | 0.015 | 0.023  |
| cover crop         | 0.073  | 0.024  | 0.000  | Schisandra chinensis | 0.016 | 0.016 | 0.016  |
| deciduous forest   | 55.720 | 55.414 | 54.734 | sea buckthorn        | 0.002 | 0.013 | 0.037  |
| dry field          | 3.644  | 1.766  | 0.477  | semi natural         | 5.953 | 6.004 | 6.381  |
| european cabbage   | 1.275  | 0.555  | 0.503  | sesame               | 0.060 | 0.178 | 0.073  |
| facilities         | 0.033  | 0.033  | 0.032  | short grass          | 0.024 | 0.037 | 0.030  |
| fallow             | 1.894  | 4.781  | 1.400  | shrub                | 1.075 | 1.038 | 0.847  |
| fatsia             | 0.051  | 0.021  | 0.032  | stream               | 0.598 | 0.595 | 0.595  |
| field margin       | 0.008  | 0.008  | 0.006  | tall grass           | 2.172 | 2.253 | 2.127  |
| ginseng            | 1.262  | 2.477  | 2.856  | transportation       | 0.772 | 0.776 | 0.734  |
| grape              | 0.326  | 0.305  | 0.163  | urban                | 0.868 | 0.864 | 0.778  |
| green onion        | 0.078  | 0.009  | 0.011  | white radish         | 2.890 | 1.808 | 1.182  |
| green pea          | 0.007  | 0.000  | 0.000  | wrapping vegetables  | 0.035 | 0.020 | 0.000  |
| greenhouse         | 0.767  | 0.850  | 0.575  | zucchini             | 0.201 | 0.125 | 0.064  |
| industrial         | 0.045  | 0.044  | 0.024  | NA                   | 0.018 | 0.033 | 12.348 |
| inland water       | 0.028  | 0.036  | 0.060  |                      |       |       |        |

## <sup>11</sup> **References**

- <sup>12</sup> Di Gregorio, A (2005). *Land Cover Classification System: Classification Concepts and*  
<sup>13</sup> *User Manual: LCCS*. Rome (Italy). Food and Agriculture Organization of the United  
<sup>14</sup> Nations (FAO).
